# Supplementary material
Source: publisher figshare collection journal article supplement (https://frontiersin.figshare.com/ndownloader/files/14961986)
Supplement: Supplementary file [file 14961986]

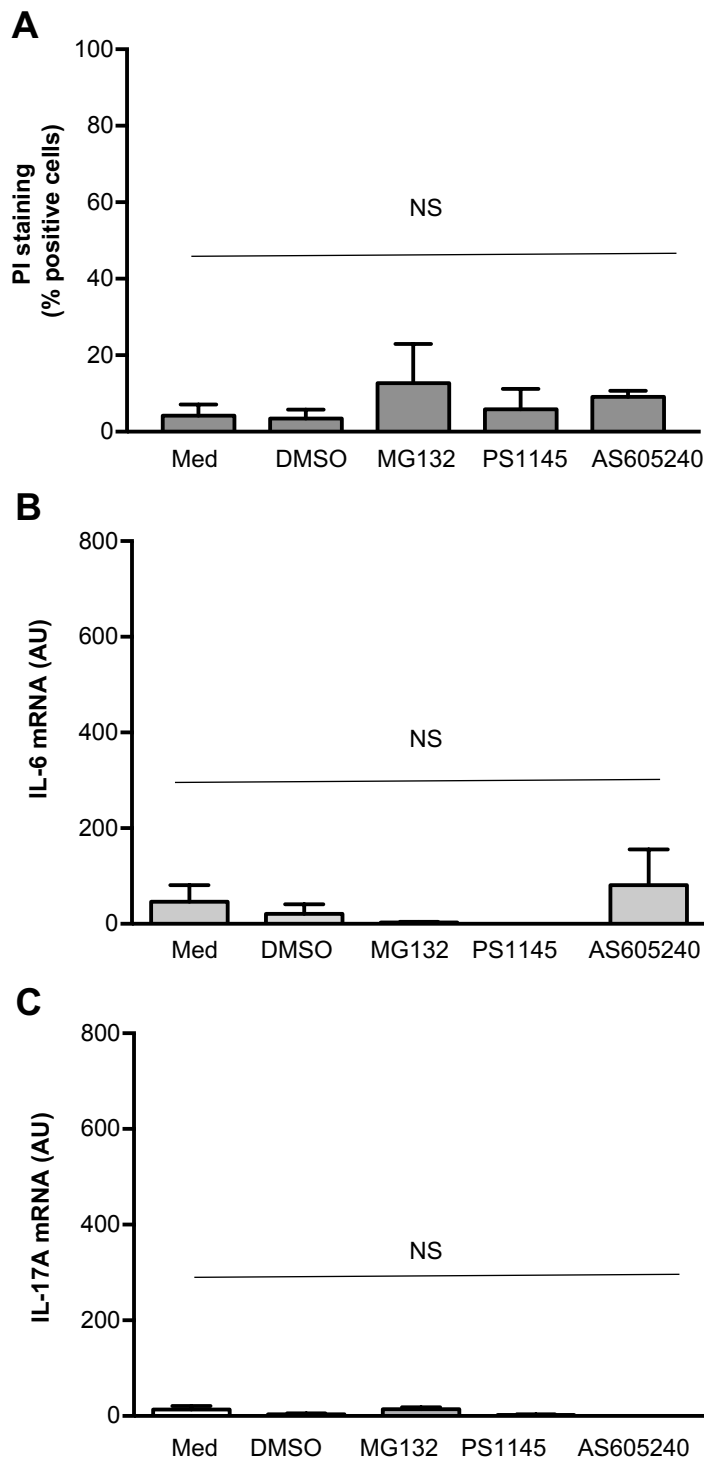

**Fig. S2. NF- $\kappa$ B and class 1 PI3K inhibitory drugs did not affect neither cell viability nor IL-17A and IL-6 basal expression.** (A) CD4<sup>+</sup> T cells from HD (n = 3) were cultured for 24 h with medium (Med) or DMSO, as vehicle control, or 5  $\mu$ M MG132, or 10  $\mu$ M PS1145, or 10  $\mu$ M AS605240. Cell death was analysed by flow cytometry by quantifying the ability of cells to incorporate propidium iodide (PI). The percentage of PI positive cells was calculated. Results express the mean  $\pm$  SD and statistical significance was calculated by Mann-Whitney test. (B, C) CD4<sup>+</sup> T cells from HD (n = 3) were cultured with medium (Med) or DMSO, as vehicle control, or MG132, or PS1145, or AS605240 and after 6 h (B) or 24 h (C) IL-6 (B) and IL-17A (C) mRNA levels were measured by real time PCR. Lines represent Results express the mean (AU)  $\pm$  SD and statistical significance was calculated by Mann-Whitney test. NS = not significant
